# Supplementary material for: Loss and Gain of Function in SERPINB11: An Example of a Gene under Selection on Standing Variation, with Implications for Host-Pathogen Interactions
Source: PubMed Central journal article supplement (PMC3290568; doi:10.1371/journal.pone.0032518), 2012-02-29
Supplement: pone.0032518.s003.pdf [file pone.0032518.s003.pdf]

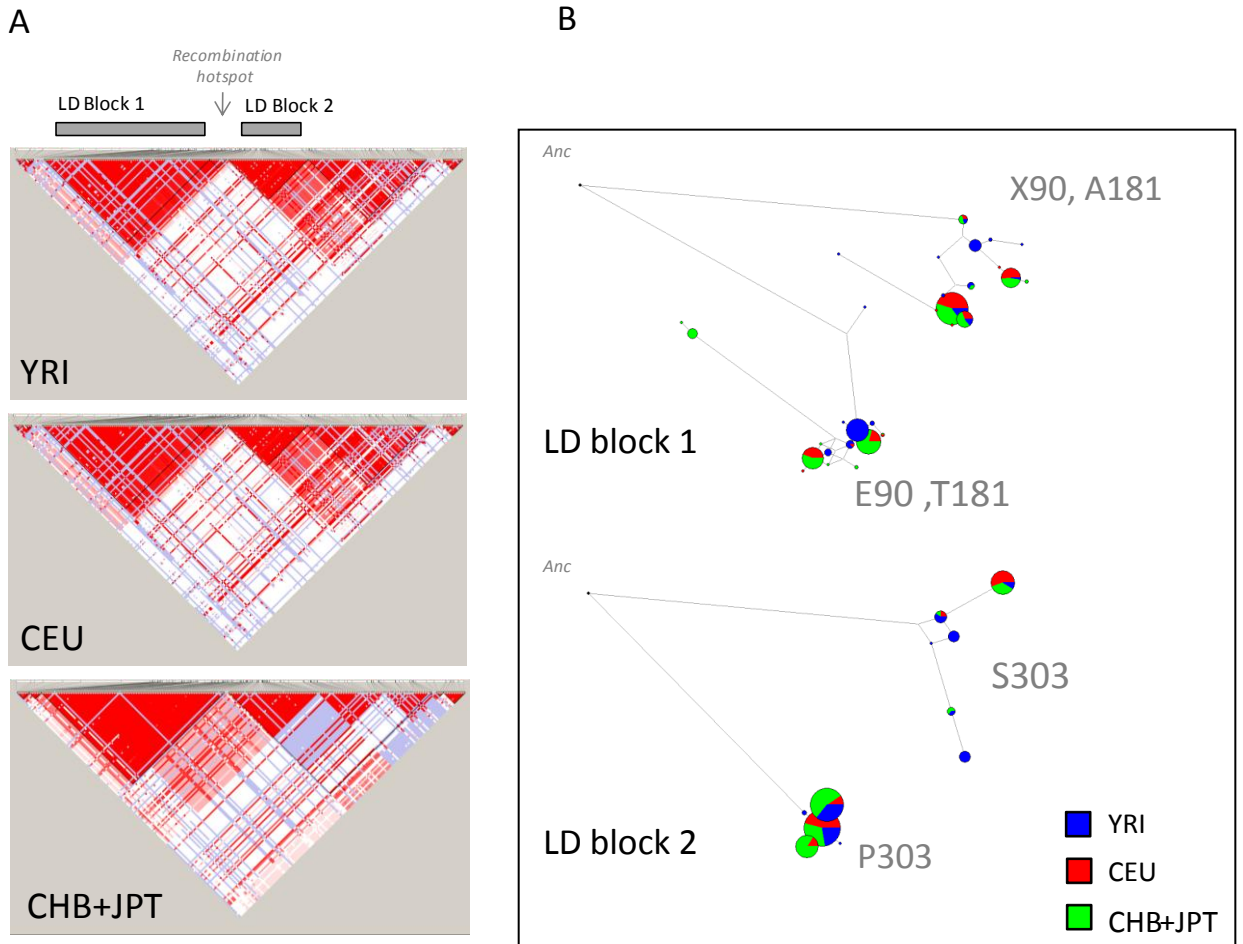

**Figure S3:** **A** - Linkage Disequilibrium (LD) plot of HapMap phase II for YRI, CEU and CHB+JPT data centered on *SERPINB11* region of chromosome 18. The image was built using *Haploview* 4.1 software. The triangular units designate LD blocks. The degree of LD between pairs of markers is indicated by the  $|D'|$  statistic ( $|D'| = 1$  bright red;  $|D'| > 1$  shades of red) LD blocks overlapping between populations are indicated. **B** – Haplotype structure of LD blocks reconstructed by median-joining networks (<http://www.fluxus-engineering.com/sharenet.htm>).
