# Supplementary material for: Loss and Gain of Function in SERPINB11: An Example of a Gene under Selection on Standing Variation, with Implications for Host-Pathogen Interactions
Source: PubMed Central journal article supplement (PMC3290568; doi:10.1371/journal.pone.0032518), 2012-02-29
Supplement: pone.0032518.s004.pdf [file pone.0032518.s004.pdf]

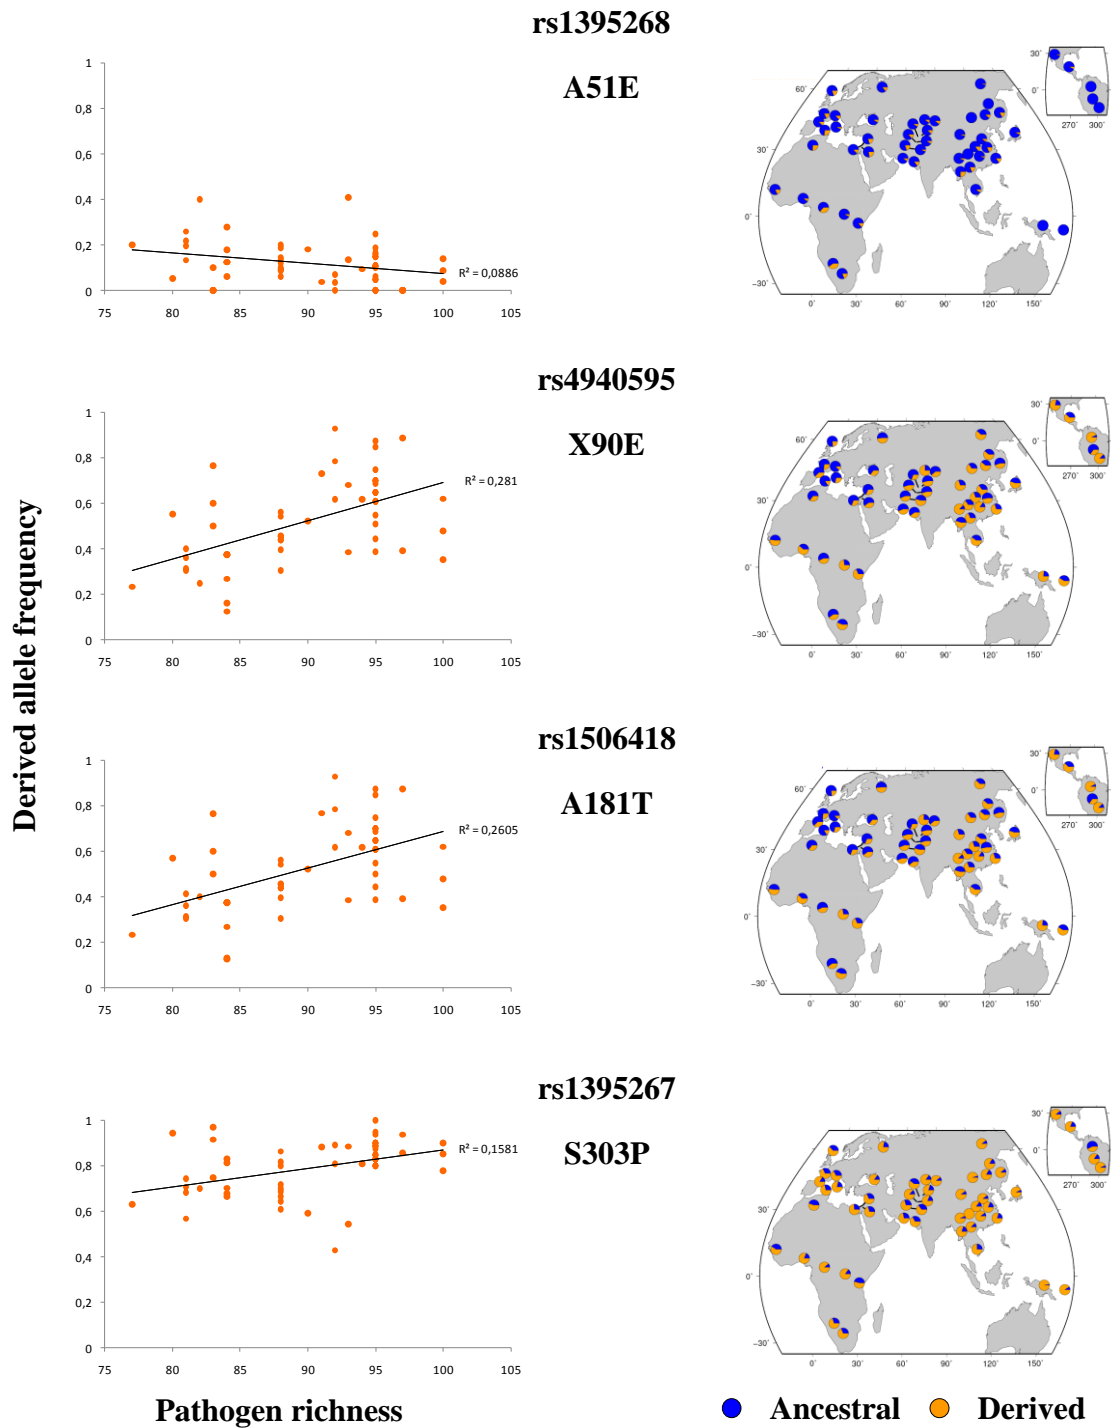

**Figure S4:** Correlation between pathogen richness and derived allele frequency for *SERPINB11* SNPs (rs1395268, rs4940595, rs1506418 and rs1395267). Worldwide frequency variation (images retrieved from HGDP selection browser - <http://hgdp.uchicago.edu/cgi-bin/gbrowse/HGDP/>)
